# Supplementary material for: Leukocyte telomere length is inversely associated with arterial wave reflection in 566 normotensive and never-treated hypertensive subjects
Source: publisher site journal article supplement (doi:10.18632/aging.103459), 2020-06-23
Supplement: Supplementary file [file aging-v12i12-103459-supplementary-material-SD2.pdf]

## SUPPLEMENTARY TABLE

Supplementary Table 1. Linear regression analyses with backward elimination of the explanatory factors for the magnitude of augmentation index.

|                           | Augmentation index (R square 0.604) |        |        |
|---------------------------|-------------------------------------|--------|--------|
|                           | B                                   | Beta   | P      |
| (Constant)                | -4.175                              |        |        |
| Age                       | 0.532                               | 0.530  | <0.001 |
| Male sex                  | -11.747                             | -0.502 | <0.001 |
| SVRI                      | 0.007                               | 0.378  | <0.001 |
| Stroke index              | 0.270                               | 0.164  | <0.001 |
| BMI                       | -0.339                              | -0.126 | 0.002  |
| Uric acid                 | 0.014                               | 0.091  | 0.017  |
| Heart rate                | -0.098                              | -0.079 | 0.029  |
| Present smoker            | 2.661                               | 0.075  | 0.007  |
| Leukocyte telomere length | -2.253                              | -0.063 | 0.033  |

SVRI, systemic vascular resistance index; BMI, body mass index.
